# Supplementary material for: An Electrochemical Sensor for the Detection of Albendazole Using Glassy Carbon Electrode Modified with Platinum-Palladium Nanocomposites
Source: MDPI journal article supplement (doi:10.3390/bios12111026), 2022-11-16
Supplement: s1 [file s1]

# **An Electrochemical Sensor for the Detection of Albendazole Using Glassy Carbon Electrode Modified with Platinum-Palladium Nanocomposites**

**Ghadeer A.R.Y Suaifan <sup>1,\*</sup>, Mohammad Khanfar <sup>2</sup>, Mayadah B Shehadeh <sup>1</sup>, Asmaa Alnajajrah <sup>3</sup>, Raghad Abuhamdan <sup>1</sup> and Sameer Ahmad Hasan <sup>4</sup>**

<sup>1</sup> Department of Pharmaceutical Sciences, Faculty of Pharmacy, The University of Jordan, Amman 11942, Jordan

<sup>2</sup> Pharmaceutical-Chemical Engineering Department, School of Applied Medical Sciences, German Jordanian University, P.O. Box 35247, Amman 11180, Jordan

<sup>3</sup> Department of Chemistry, The University of Jordan, Amman 11942, Jordan

<sup>4</sup> Biomedical Engineering Department, School of Applied Medical Sciences, German Jordanian University, P.O. Box 35247, Amman 11180, Jordan

\* Correspondence: gh.suaifan@ju.edu.jo or ghadeer\_petra@yahoo.com; Tel.: +962-7-7560-8695

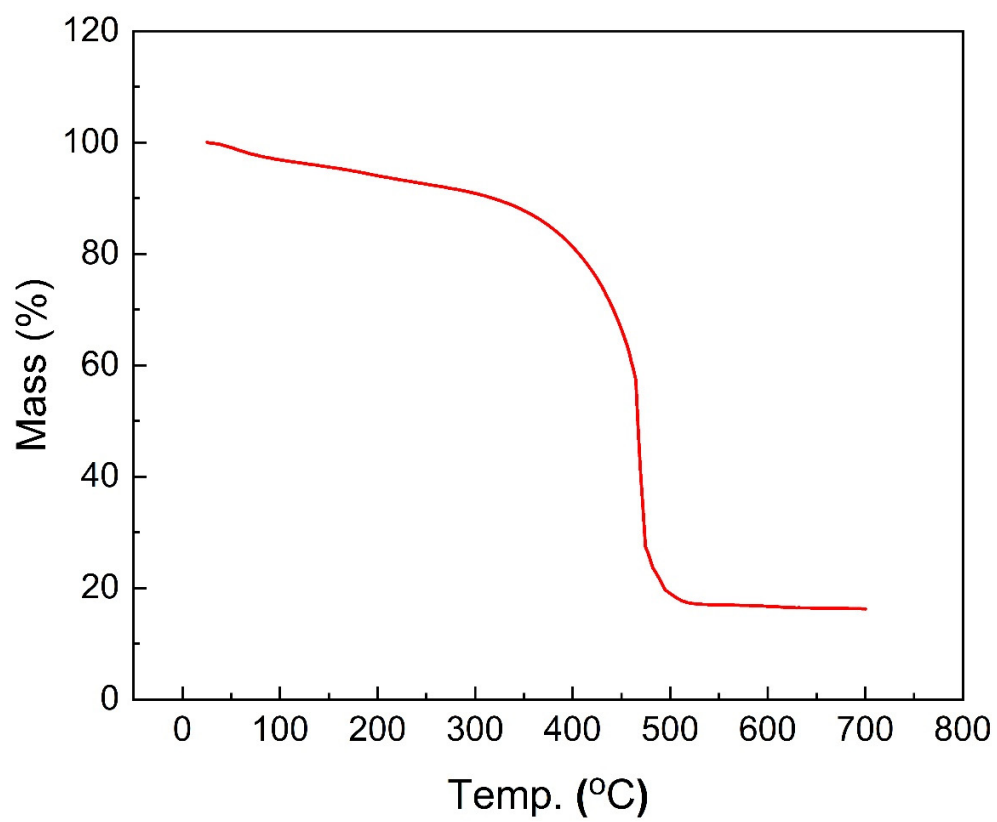

**Figure S1.** Thermograph of Pt-Pd/Carbon catalyst. Heating rate = 10 °C/min.
